# Supplementary material for: Assemblable thermoelectric Lego blocks for reconfigurable, self- healing, and flexible power generators
Source: Research Square preprint supplement (doi:10.21203/rs.3.rs-8142150/v1), 2025-12-05
Supplement: Supplementary file 1 [file ba6dd2976093d0983a4b8594.pdf]

## Supplementary Information

### **Assemblable thermoelectric Lego blocks for reconfigurable, self-healing, and flexible power generators**

**Keonkuk Kim<sup>1†</sup>, Kyuha Park<sup>2†</sup>, Jihyang Song<sup>3</sup>, Ji Eun Lee<sup>4\*</sup>, Donghee Son<sup>2,3\*</sup>, and Jae Sung Son<sup>1\*</sup>**

*<sup>1</sup>Department of Chemical Engineering, Pohang University of Science and Technology (POSTECH), Gyeongsangbuk-do 37673, Republic of Korea.*

*<sup>2</sup>Department of Electrical and Computer Engineering, Sungkyunkwan University (SKKU), Suwon 16419, Republic of Korea*

*<sup>3</sup>Department of Artificial Intelligence System Engineering, Sungkyunkwan University (SKKU), Suwon 16419, Republic of Korea*

*<sup>4</sup>School of Chemical Engineering, Chonnam National University (CNU), Gwangju 61186, Republic of Korea*

**a**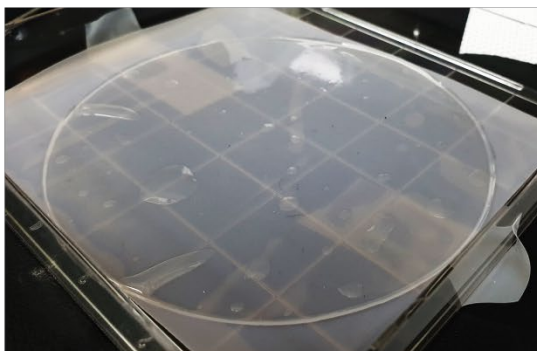**b**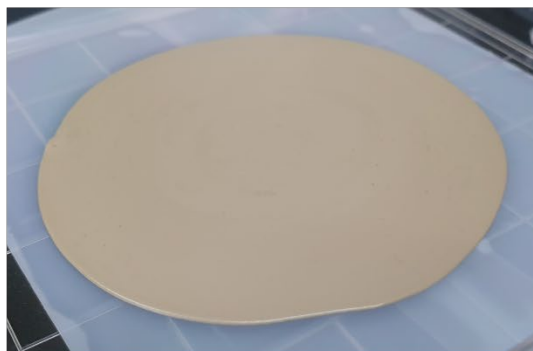**c**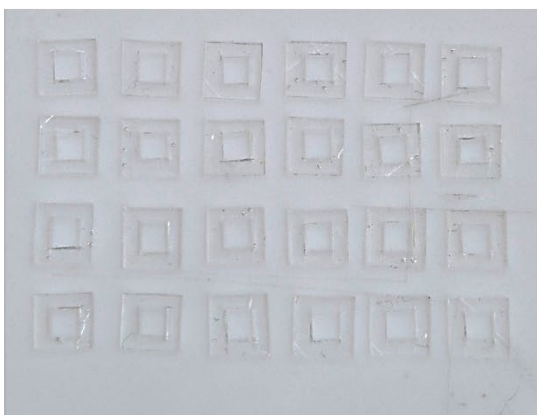**d**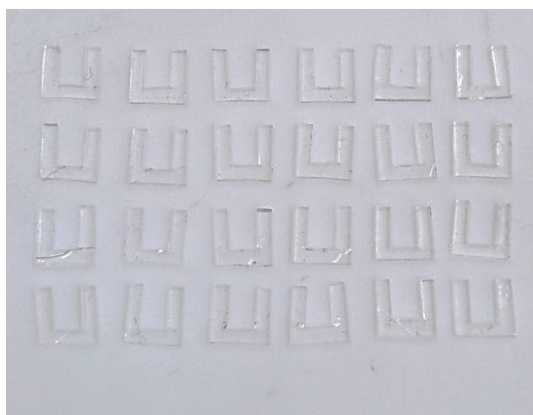**e**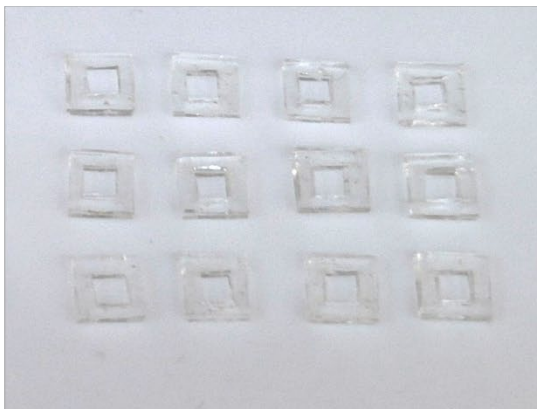**f**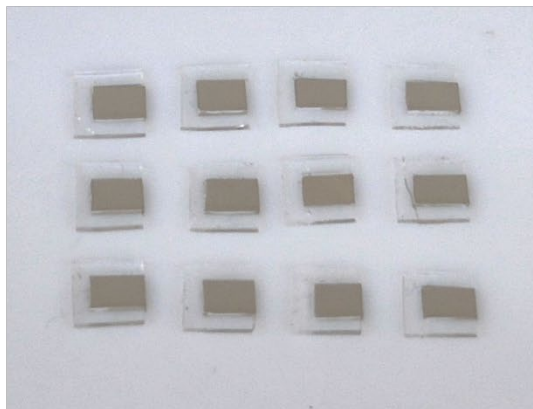

### Supplementary Fig. 1 | Photographs of SHP and AgF-SHP samples

Photographs of **a.** as-prepared SHP film, **b.** as-prepared AgF-SHP film, **c.** hollow-squared cut SHP films, **d.** U-shaped cut SHP films, **e.** center part of TE Lego block and **f.** upper and lower electrode part of TE Lego block.

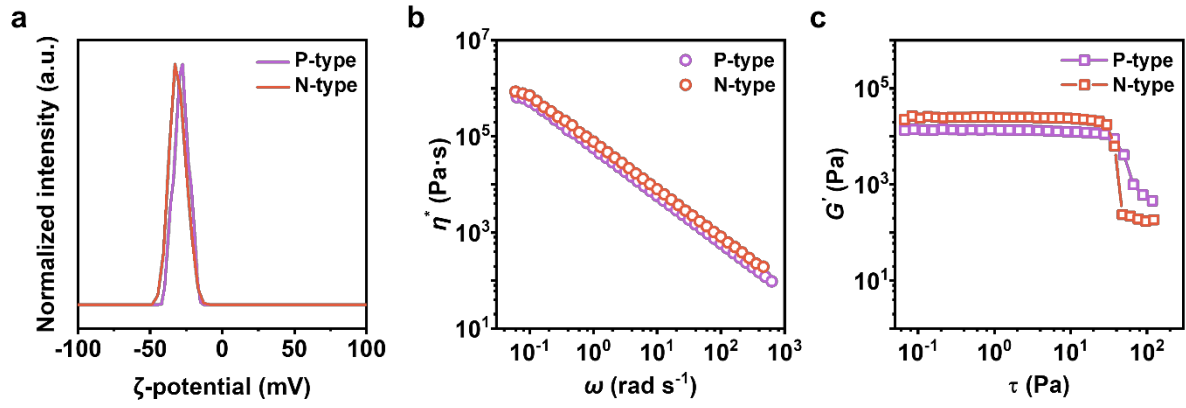

**Supplementary Fig. 2 | Characterization of TE 3D printing inks**

**a.**  $\zeta$ -potential, **b.** Complex viscosity ( $\eta^*$ ) dependent on the angular frequency and **c.** Storage moduli ( $G'$ ) dependent on the shear stress of the p-type and n-type TE 3D printing inks

**a**

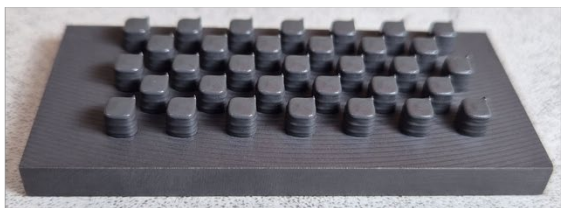

**b**

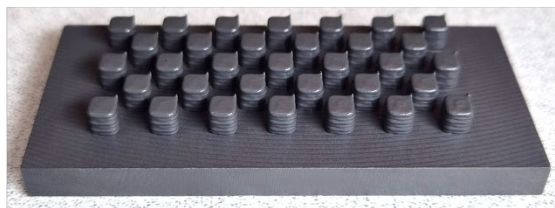

**Supplementary Fig. 3 | 3D-printed p-type and n-type TE legs**

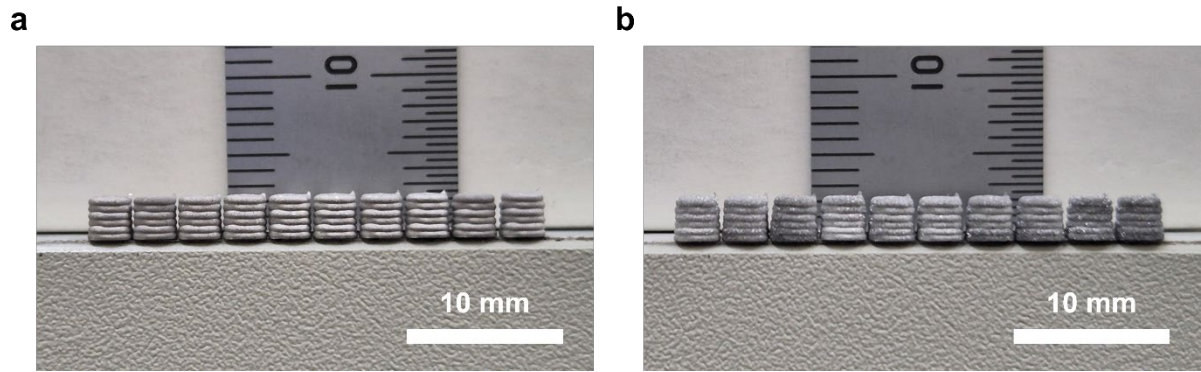

**Supplementary Fig. 4 | Volume shrinkage comparison of 3D-printed TE legs**

Photographs of the 3D-printed and sintered **a.** p-type and **b.** n-type TE legs by one-step 3D-printing process

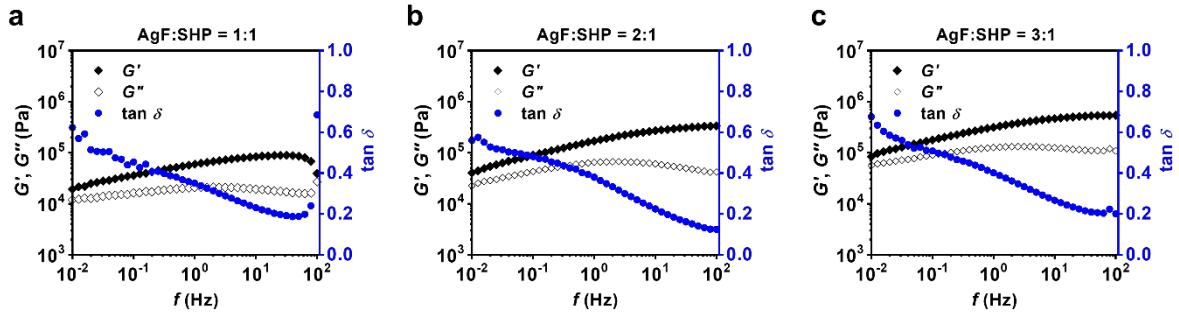

**Supplementary Fig. 5 | Rheological properties of AgF-SHP with different weight ratios**

Storage modulus ( $G'$ ), Loss modulus ( $G''$ ), and  $\tan \delta$  (shown in blue) of **a.** AgF-SHP = 1:1, **b.** AgF-SHP = 2:1, and **c.** AgF-SHP = 3:1 samples, respectively

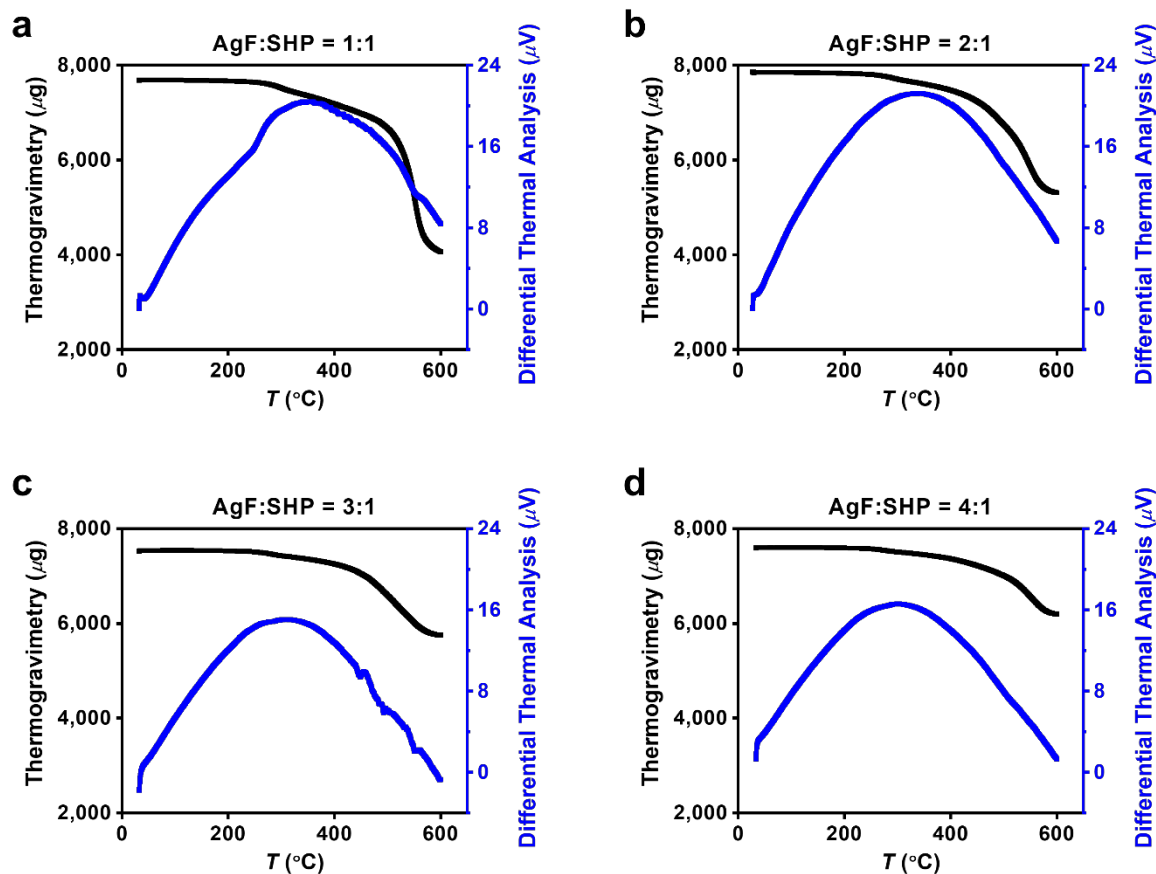

**Supplementary Fig. 6 | Temperature-dependent TGA curves of AgF-SHP with varying AgF loading ratios**

Continuous weight loss with increasing temperature and differential thermal analysis (DTA, shown in blue) from 0 °C to 600 °C for the AgF-SHP series: **a.** AgF-SHP = 1:1, **b.** AgF-SHP = 2:1, **c.** AgF-SHP = 3:1, and **d.** AgF-SHP = 4:1 samples, respectively

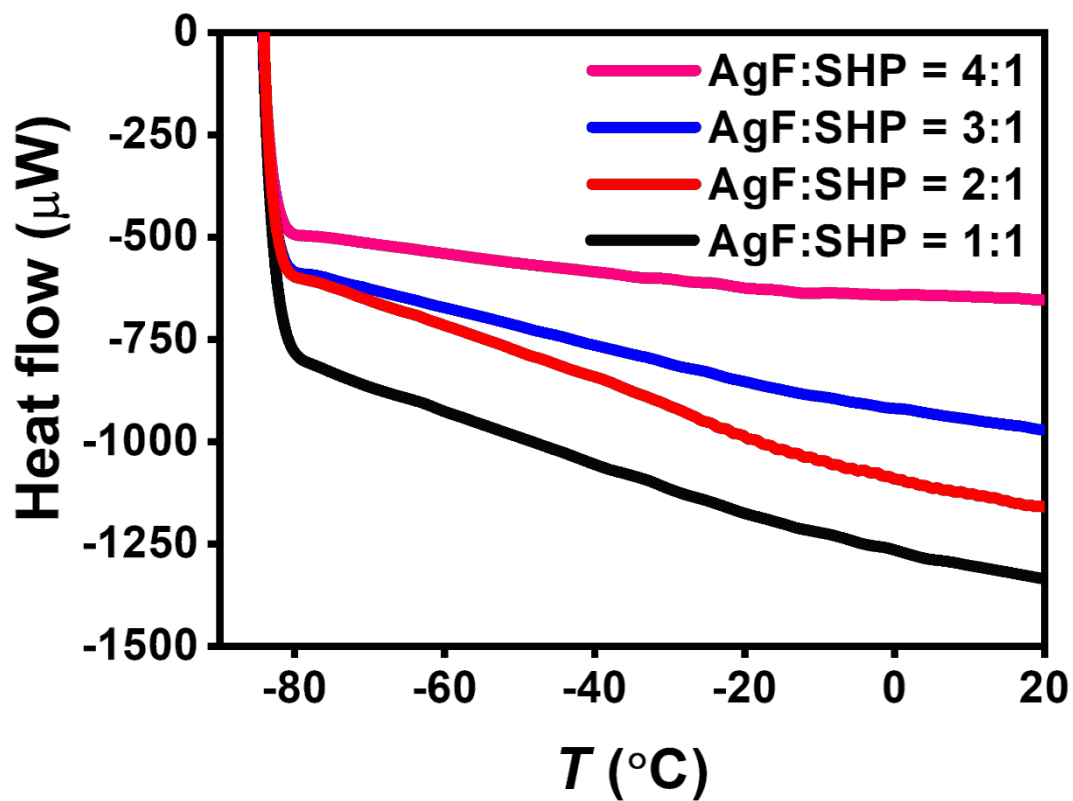

**Supplementary Fig. 7 | Temperature-dependent DSC curves of AgF-SHP with varying AgF loading ratios**

Heat flow variations as a function of temperature reveal the thermal transitions of the AgF-SHP series in the range of  $-80\text{ }^{\circ}\text{C}$  to  $20\text{ }^{\circ}\text{C}$



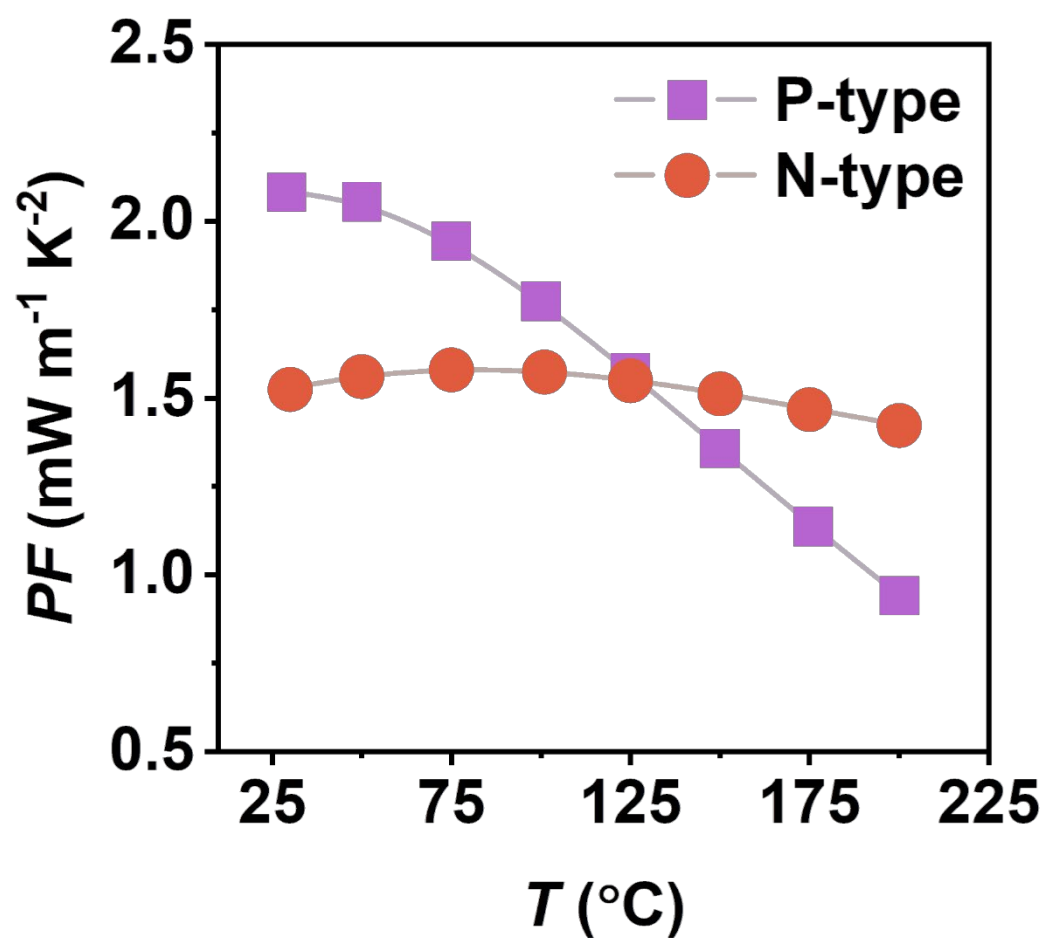

Supplementary Fig. 8 | Temperature-dependent power factor of the 3D-printed p-type and n-type TE materials

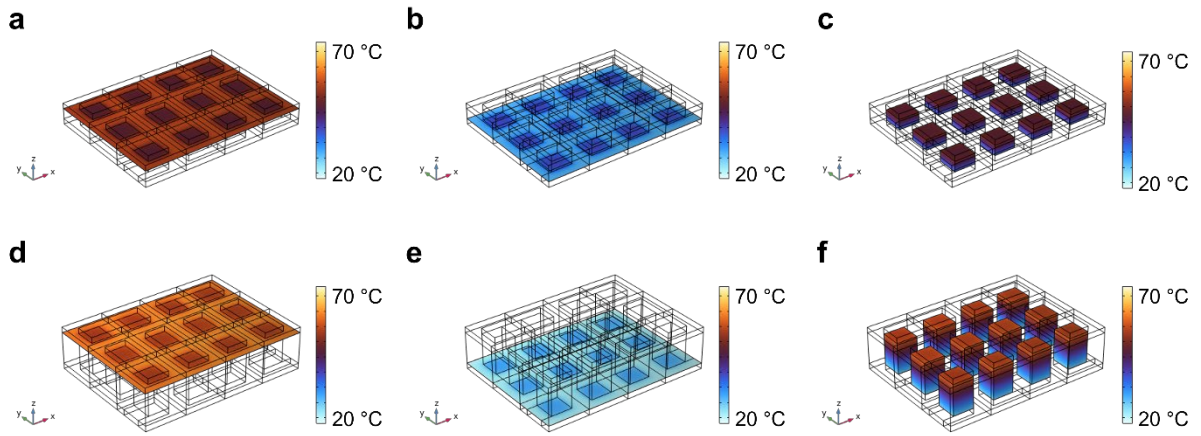

**Supplementary Fig. 9 | Temperature distribution simulation of TE Lego block devices using COMSOL**

Temperature distribution of **a.** upper part, **b.** lower part and **c.** TE leg parts with low aspect ratio of TE legs and **d.** upper part, **e.** lower part and **f.** TE leg parts with high aspect ratio of TE legs

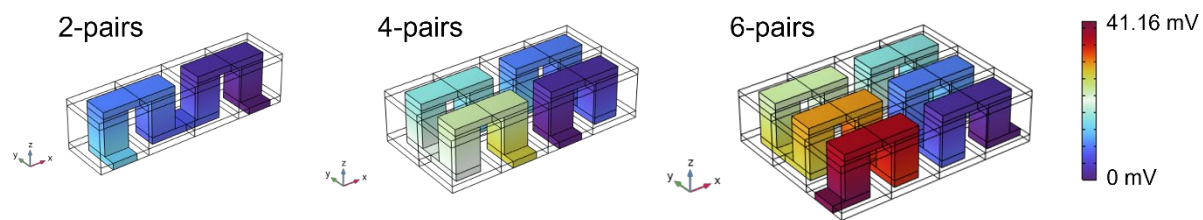

**Supplementary Fig. 10 | Output voltage simulation of 2, 4 and 6 pairs of TE Lego block devices using COMSOL**

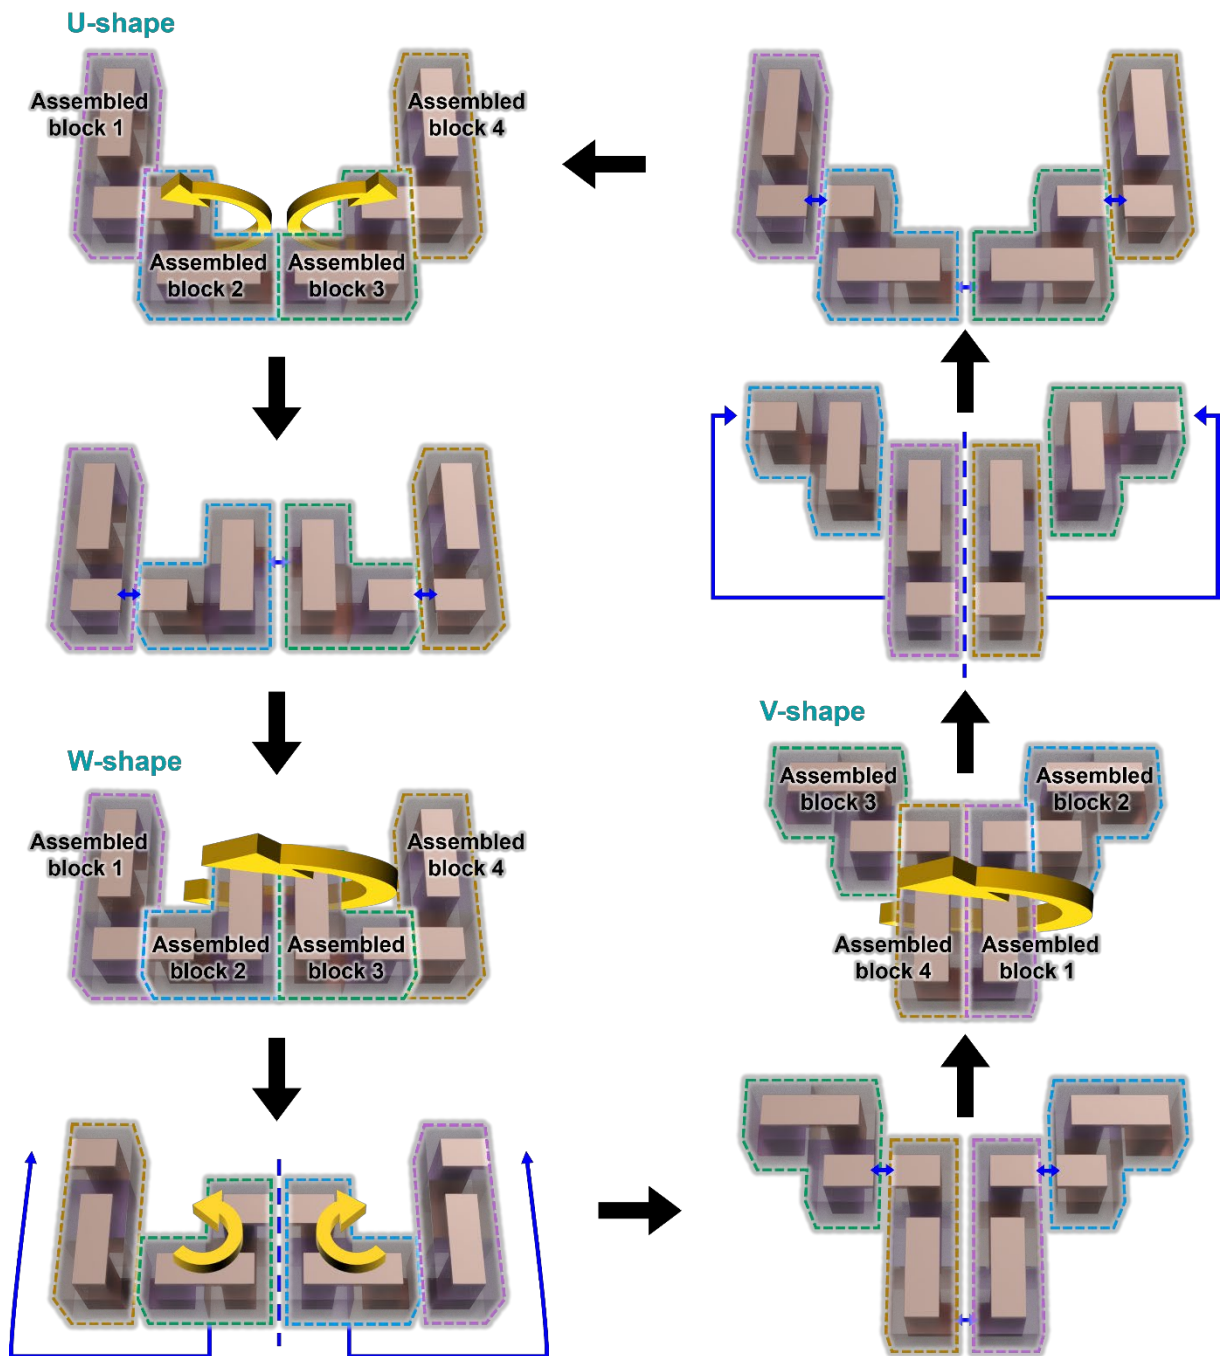

Supplementary Fig. 11 | Reconfiguring method of U-, V- and W-shaped TE Lego block devices

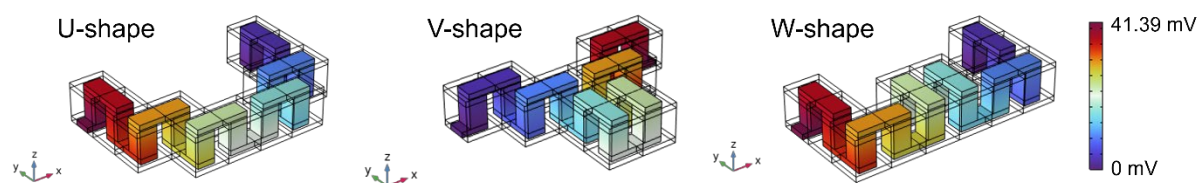

**Supplementary Fig. 12 | Output voltage simulation of U-, V-, W-shaped TE Lego block devices using COMSOL**
